# Supplementary material
Source: PubMed Central journal article supplement (PMC6867866)
Supplement: IAI.00746-19-s0001.pdf [file IAI.00746-19-s0001.pdf]

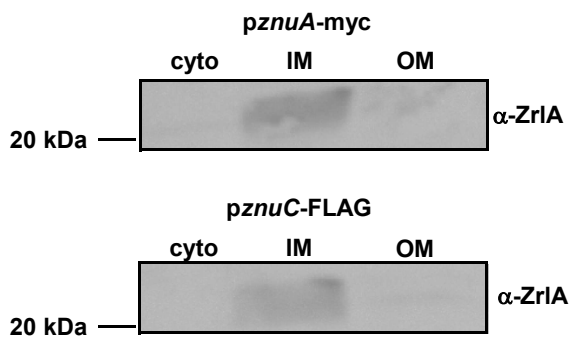

**Figure S1. Successful fractionation of *A. baumannii* as determined by a marker of the inner membrane.** 10  $\mu$ g of the *A. baumannii* cellular fractions used in Fig. 1C were subjected to immunoblot using a rabbit antibody generated against the known *A. baumannii* inner membrane protein ZrIA.

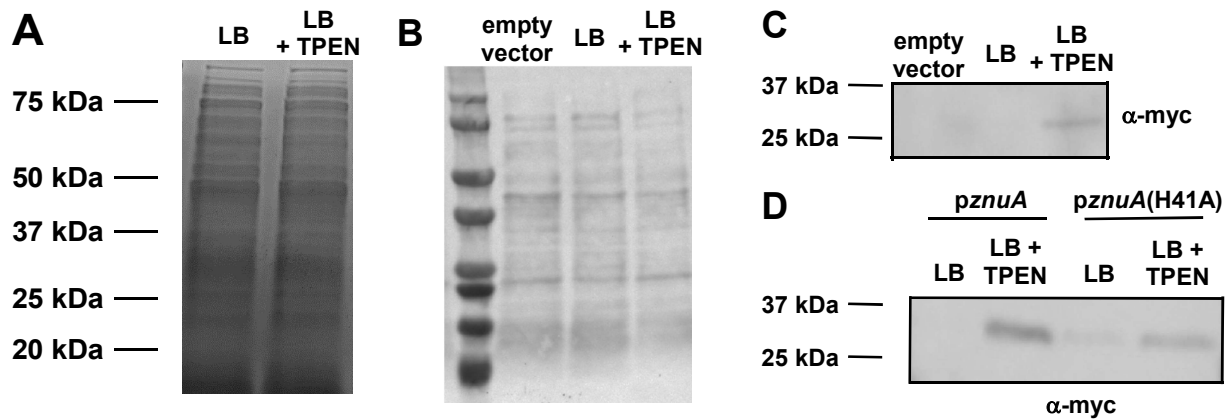

**Figure S2. ZnuA is induced in low Zn and ZnuA(H41A) is expressed.** (A) Lysates of  $\Delta znuA$  *pznua* grown in LB or LB + 30  $\mu$ M TPEN were run on an SDS-PAGE gel and stained with Imperial Protein Stain. This gel was run in parallel with Fig. 3A demonstrating loading of 10  $\mu$ g protein per lane. (B) Lysates of  $\Delta znuA$  containing an empty pWH1266 vector grown in LB + 30  $\mu$ M TPEN, as well as  $\Delta znuA$  *pznua* grown in LB or LB + 30  $\mu$ M TPEN were run on an SDS-PAGE gel and transferred to a nitrocellulose membrane, then stained with Ponceau S. (C) The membranes from B were destained, then probed using an  $\alpha$ -myc antibody. (D) Single nucleotide substitution of A for H was made to *znuA* at position 41 on pWH1266.  $\Delta znuA$  cells expressing either *pznua*-myc or *pznua*(H41A)-myc were grown in either LB or LB + 30  $\mu$ M TPEN and 10  $\mu$ g of cell lysate was added to each lane for immunoblotting.

```

E. coli -----VVASLKPVGFIASAIADGVTETEVLLPDGASE H DYSLRPSDVKRLQNADL
S. typhi -----VVASLKPVGFIASAIADGVTDTQVLLPDGASE H DYSLRPSDVKRLQGADL
Y. pestis -----SAAVVT SIRPLGFIAAAIADGVLPTVLLPDGASP H DYALRPSDVQRLRSAEL
P. aeruginosa -----VLTS IKPLQQIAAAVQEGVGSPEVLLPPGASP H HYALRPSDVRRVGDADL
A. baumannii MSTLGSQGLVVSTHPIYLI AKEITKGVVEEPQLLQ-GQSG H DVQLTPAHRKAINDATL
N.menigitidis -----VAKQI GGDRVAVQSLVGANQDS H AYHMTSGDIKKIRSAKL

E. coli VVWVGPEMEAFMQKPVSKLPGAKQVTIAQLE DVKPLLMK-----
S. typhi -VVWVGPEMEAFMEKSVRNIPDNKQVTIAQLADV KPLLMKGADDEDEHAHTGADEEKGDVH
Y. pestis VIWVGPEMEAFLSKPLTQVAENKQIALS QLP SVTPLLKMSDEHDEAE EGESGH HHDHAKDN
P. aeruginosa LYWIGPDMESFLPRVLGSR-SKATVAVQSLP SMKLRHFGEDSH SHEEADHDEHDD-----
A. baumannii VIWLGAHEAPLNKLLSNKKAIALL DSGILS ILPQRNTRG-----
N.menigitidis VLLNGLGLEAADVQRAVKQSKVPFAEATKGIQALKAEEGGHHHHDHDEGH-----

E. coli ----SIHGDFNM H LWLSPEIARATAVAIHGKLVELMPQSRAKLDANLKD FEAQLAST--E
S. typhi ----HHHG EYNM H LWLSPEIARATAVAIHEKLVELMPQSRAKLDANLKD FEAQLAAT--D
Y. pestis PTDDHHHG EYNM H IWLSPAIAKQAAIAIHDRLL ELTPQNKDKLDANLRRFEYQLAQN--E
P. aeruginosa ----HRPGSLDA H LWLSVSNARVIAGKMAADLAQADPANAARYQHNLKVFS DRMDAL--D
A. baumannii ---AALPNTVDT H VWLEPNNAVRI GFFIAALRSQQHPENKAKYWNNA NTFARNMLQA--A
N.menigitidis ----HDHG EFD H WVTDPVLMGTYAQNVANALIQADPEGKTY YQQLGNYQMQLK LHS D

E. coli TQVGNELAPLKGKGYFV H DAYGYFEKQFGLTPLGHFTVNPEIQPGAQRLHEIR-----
S. typhi KQVGNELAPLKGKGYFV H DAYGYEKHYGLTPLGHFTVNPEIQPGAQRLHEIR-----
Y. pestis KNIVTMLKPVQKGYFV H DAYGYFENHFGLSPLGHFTVNPEIQPGAQRLHQIR-----
P. aeruginosa ERIKARVAGIAGKPYFV H EAFDYFEAEYGLKHTGVFSVAS EVQPGAQHVAAMR-----
A. baumannii QAYDSSSN---GKPYWSY H DAYQY LERSLN LKFAGALTDDPHVAPTAAQIKYLNDSRPKA
N.menigitidis AQAAFN AVPAAKR KVL TG H DAF SYMGKRYNIEFIAPQGV SSEAEP SAKQV-----

```

**Figure S3. ZnuA sequence is conserved among Gram-negative pathogens.** *znuA* sequences from 6 different Gram-negative pathogens were aligned using CLUSTALW. Predicted Zn-binding residues are highlighted in red, and H41 mutated in Fig. 3B is boxed.

**A. baumannii** --MLFYKNILTLSILAAISI PVFAAENENVEKLETIRIKAHPLAQTS---KDFAVADTVVDQKHLTEGAATIGDALNSEVGIYANQFGAGSSRPVIRG  
**N. meningitidis** MAQTTLKPIVLSILLINTPLLAQAHETEQ SVDLET VSVVVGKSRPRAT SGLLHT STASDKIISGDTLRQKAVNLGDALDGVPGIHASQYGGGASAPVIRG

**A. baumannii** QDGPRVKVLQNSSENVDVSTLSPD **H** AVTVDPVLAKQVEVIRGPSTLLFGAGTVGGLVNVINDNKIPTQMPENGYEQVGLRYNTGSDEKLASAGVTVGL  
**N. meningitidis** QTGRRIKVLNHHGETGDMADFSPD **H** AIMVDTALSQQVEILRGPVTLTYSSGNVAGLV DVADGKIPEKMPENGVSGELGLRLSSGNLEKLTSGGINIGL

**A. baumannii** GSQVALRVEGLTRDANNYIAPNYIHEGKERRVDNTFAQGDSVNVGLSWIYDRGYTGISYSNRRDQYGLPGHSHEYETCSAHLTGR-----PH  
**N. meningitidis** GKNFVLTHTGLYRKSGDYAVPRYRN----LKRLPDSHADSQTG SIGLSWVGEKGFIVGAYSDDRRDQYGLPAHSHEYDDCHADIIWQKSLINKRYLQLYP

**A. baumannii** LHCDAHEHDHEEGEEAAH---EEHEHEHGG-PWIDLKSERYDFKTELNDPFAGFQKLRQAAS YTDYQHDEIEEGAIATRFQNKGYDGRIELVHNPIAD  
**N. meningitidis** HLLTEEDIDYDNPGLSCGFHDDDNAHAHTHSGRPWIDLNRNKRYELRAEWKQPFPGFEALRVHLNRNDYRHDEKAGDAVENFFNNQTQNARIELRHQPIGR

**A. baumannii** WEGVIGTQLGQQK-----LNLTGEEAFMAPTTTCKWSVFALEHKQWKAVHFELSARADQQEIDVDDNSKQD-----FDGSAFSYAGAA  
**N. meningitidis** LKGSWGVQYLQKSSALSAISEAVKQPMLLDNKVQHYSFFGVEQANWDNFTLEGGVRVEKQKASIQYDKALIDRENY YNHPLPLDGAHRQTARSAFALSG

**A. baumannii** NWEFAPNYKLSFVASHQERLPLAQELYANGA **H** FATNTYELGNDQLSKEKSNVLEGLHFDNDKLDYHLHVYHNFDDYIYAQTLDR-----YKDF  
**N. meningitidis** MWYFTPQHKLSTASHQERLPLSTQELYAHGK **H** VATNTFEVGNKHLNKERSNNIELALGYEGDRWQYNLALYRNRFGNYYIYAQTLNDGRGPKSEDDSEM

**A. baumannii** RLVOYTQDKARFYGAEGEIGYQITPMYKISAFGDYVRG-----KI DAEG-----NAPRIPAGRLGTKVDA DFGDGFSGSAEY YHIFNQDK  
**N. meningitidis** KLVRYNQSGADFYGAEGEITYFKPTPRYRIGVSGDYVRGRLKNLPSLPGREDAYGNRPFI AQDDQNAPRVPAARLGFHLKASLTDRIDANLDYYRVFAQNK

**A. baumannii** IAAYETETEGYNMLNLGVAYSQYQYAKTDYRVYLKANNLLDDTVYQHASFVLSNIPQVGRNFTVGVDFSF  
**N. meningitidis** LARYETRTPGHMLNLGANYR-RNTRYGEWNWYVKADNLLNQSVYAHSSFLSDTPQMGRSFTGGVNVKF

**Figure S4. ZnuD is a conserved outer membrane protein with predicted Zn binding residues.** *znuD* sequence from *A. baumannii* was aligned with *znuD* from *N. meningitidis* using CLUSTALW. Residues shown to bind Zn in *N. meningitidis* are highlighted in purple.
